# Supplementary material for: Direct in vivo imaging of ferrous iron dyshomeostasis in ageing Caenorhabditis elegans
Source: Royal Society of Chemistry journal article supplement (doi:10.1039/c5sc00233h), 2015-01-01
Supplement: c5sc00233h1.pdf [file c5sc00233h1.pdf]

**Supplementary Information for:**

**Live imaging of ferrous iron dyshomeostasis in ageing *Caenorhabditis elegans***

Simon A. James, Blaine R. Roberts, Dominic J. Hare, Martin D. de Jonge,  
Ian E. Birchall, Nicole L. Jenkins, Robert A. Cherny, Ashley I. Bush and  
Gawain McColl

**Supplementary Table 1:** New strains used in this study.

| <b>Name</b> | <b>Genotype</b>                                                          | <b>Reference</b> |
|-------------|--------------------------------------------------------------------------|------------------|
| GMC005      | <i>ftn-2(ok404)</i> I ; <i>ftn-1(ok3625)</i> V                           | This study       |
| GMC006      | <i>ftn-2(ok404)</i> I ; <i>daf-2(e1370)</i> III                          | This study       |
| GMC007      | <i>ftn-2(ok404)</i> I ; <i>daf-2(e1370)</i> III ; <i>ftn-1(ok3625)</i> V | This study       |

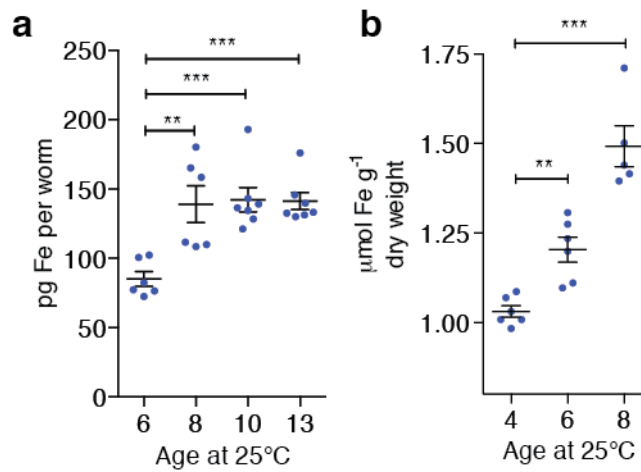

**Supplementary Figure 1: (a)** Bulk iron levels measured by ICP-MS from aging cohorts of wild type (shown is mean total iron per worm  $\pm$  SEM, 100 animals per measure). **(b)** Bulk iron levels (measured via ICP-MS) from aging cohorts of wild type (shown is mean  $\mu\text{mol}$  iron per dry weight  $\pm$  SEM; \*\*  $p < 0.01$ , \*\*\*  $p < 0.001$ , 2-tailed  $t$ -test).

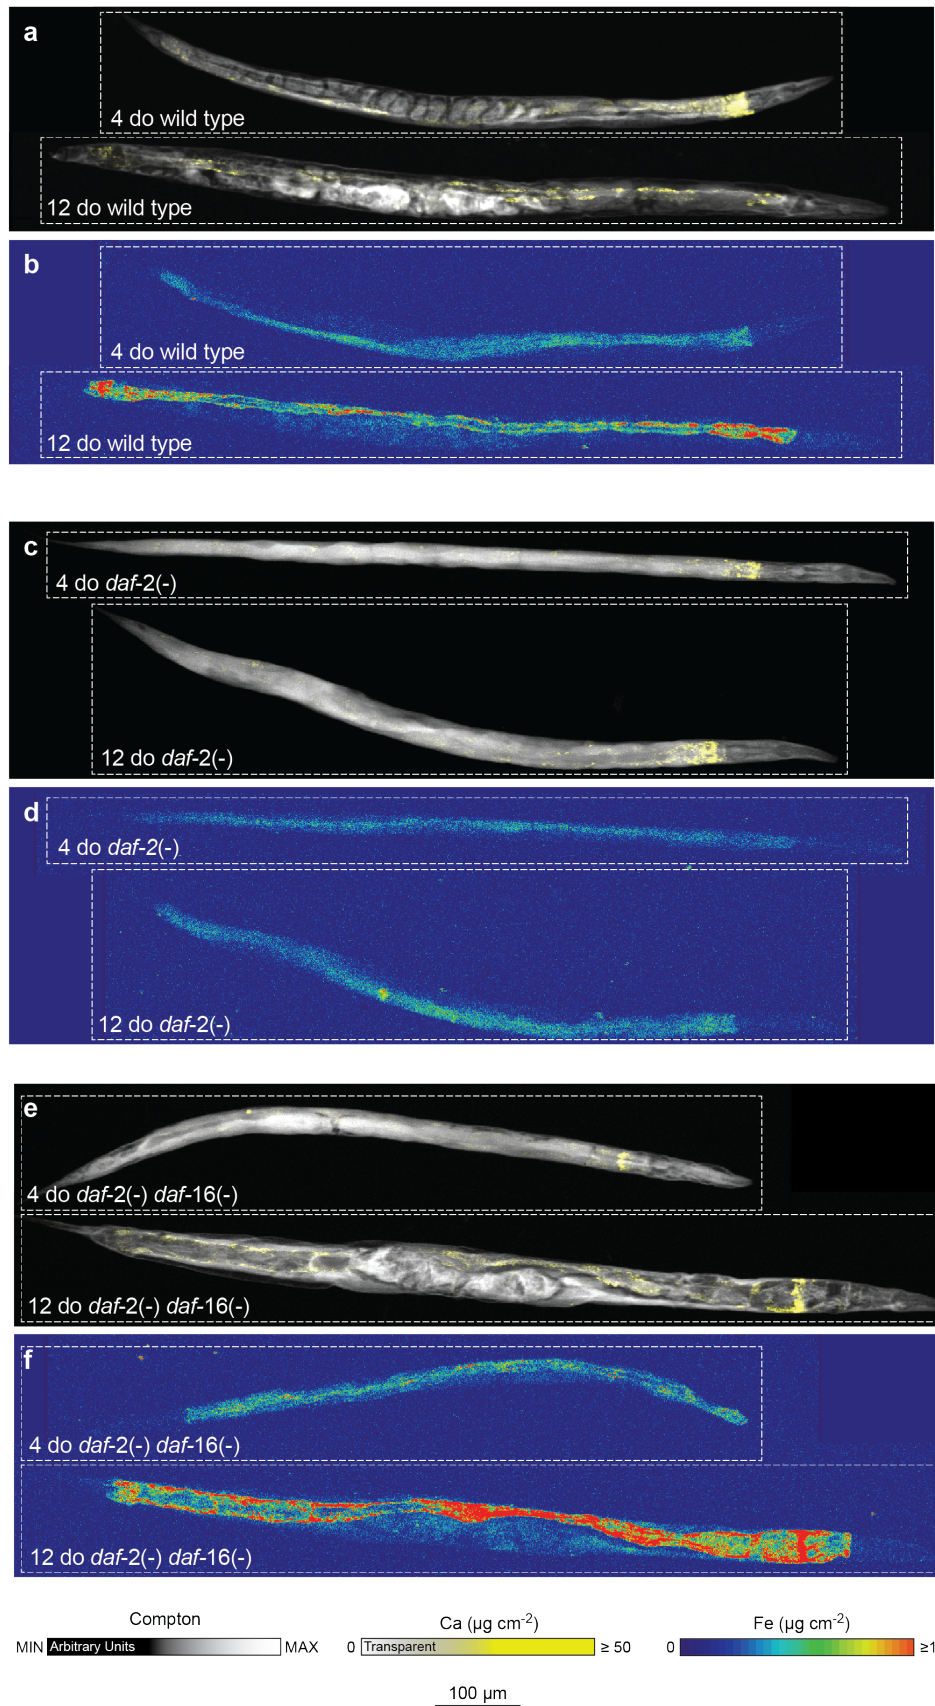

**Supplementary Figure 2:** Representative X-ray fluorescence micrographs of wild type, *daf-2(-)* and *daf-2(-):daf-16(-)* adult *C. elegans* (4- and 12-day old). (a), (c), (e)

Inelastic scatter of incident photons (Compton scatter) provides anatomical visualization (greyscale), and intestinal cells are highlighted by calcium (yellow). **(b)**, **(d)**, **(f)** While considerable age-related increases in the iron load were observed for wild type animals and short lived *daf-2(-):daf-16(-)* the *daf-2* mutants show a very minor increase in iron load over lifespan along with good anatomical preservation.

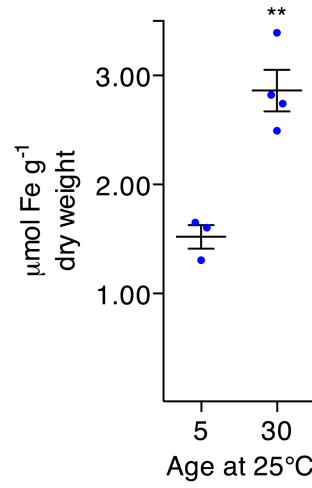

**Supplementary Figure 3:** Bulk iron levels (measured via ICP-MS) from young (5-day old) versus 30-day old *daf-2(e1370)* animals (shown is mean  $\mu\text{mol}$  iron per dry weight  $\pm$  SEM; \*\*  $p < 0.01$ , 2-tailed  $t$ -test).

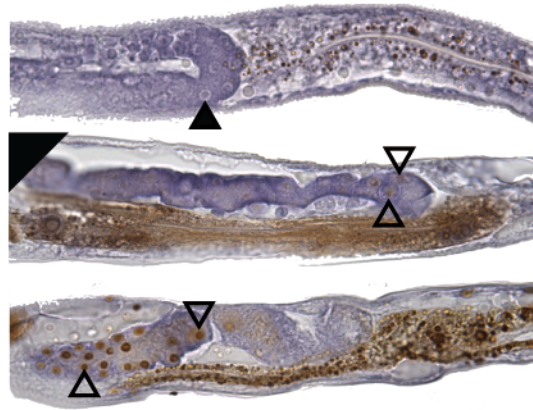

**Supplementary Figure 4:** Histological staining for Fe (brown) in young (4-day, *top*), post-reproductive (8-day, *middle*) and old (12-day, *bottom*) *C. elegans*. Mid-body sections distal gonad nuclei free of iron in young adults (solid triangles). Aged individuals have increasing ectopic iron deposits within the germline nuclei (open triangles).

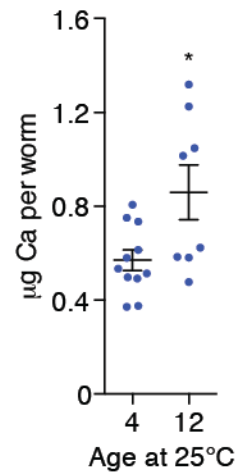

**Supplementary Figure 5:** Total calcium increases with age in wild type ( $p < 0.05$ , 2-tailed  $t$ -test). Shown are mean  $\pm$  SEM from age matched individual XFM images.



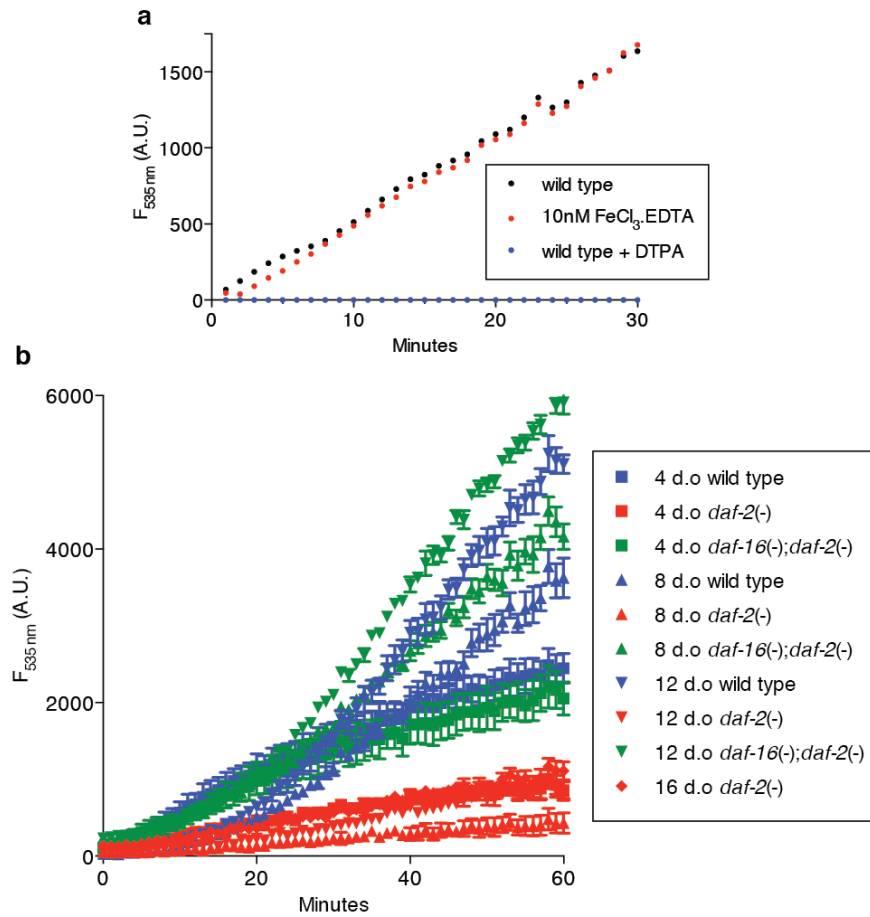

**Supplementary Figure 6:** *Ex vivo* DCF validation. **(a)** ROS production detected by DCF fluorescence from lysates of young adult wild type *C. elegans* (10µg), including a positive control of 10 nM  $\text{FeCl}_3\cdot\text{EDTA}$ . ROS production was silenced by addition of 50 µM diethylenetriamine penta-acetic acid (DTPA). **(b)** DCF fluorescence increasing over time in lysates from 4, 8, 12 and 16-day old wild type, *daf-2*(-) and *daf-16*(-);*daf-2*(-) animals.

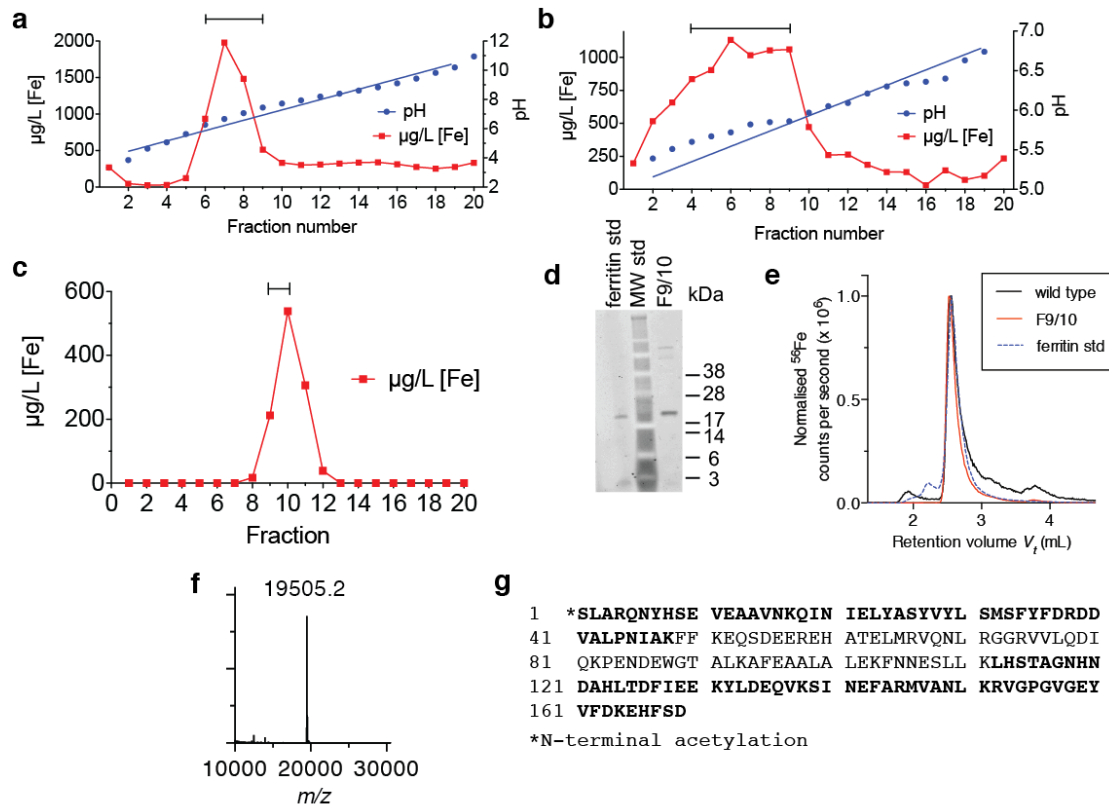

**Supplementary Figure 7: Purification of native *C. elegans* ferritin.** Since Peak #2 (Fig. 3a) is the major iron fraction at all ages, to identify the main protein component of this peak a large number of animals of mixed ages were pooled. 10g of soluble fraction of *C. elegans* lysate was applied to (a) isoelectric focusing (pH 3-10) and separated fractions were measured for iron content by atomic absorption spectroscopy. Fractions 6-8 were pooled and refocused. (b) Fractions 4-9 were collected from a narrower isoelectric refocusing (pH 5-7). (c) Native size exclusion of pooled samples resolved a iron containing peak. Fractions 9 and 10 (F9/10) were pooled for further analysis via immunoblotting and mass spectrometry. (d) Oriole stained SDS-PAGE of (1) Horse ferritin, 2) Protein size standards and 3) F9/10, showing a protein species in F9/10 resolving at ~19 kD. (e) LC-ICP-MS of lysate from wild type *C. elegans* (starting material), F9/10 and Horse ferritin showing co-elution of native horse ferritin and material in F9/10. (f) MALDI MS of identifies a single parent species of 19505.2 Da in F9/10 purified *C. elegans* FTN-2. (g) MALDI-MS/MS of lysC-digested F9/10 identifies protein as FTN-2 (62% sequence coverage over 6 fragments, Mascot score of 136,  $p = 2.3 \times 10^{-5}$ ). Shown in bold are the residues in the identified fragments of FTN-2 identified residues. Note the starting methionine has been cleaved and the mature protein has a N-terminal acetylation.

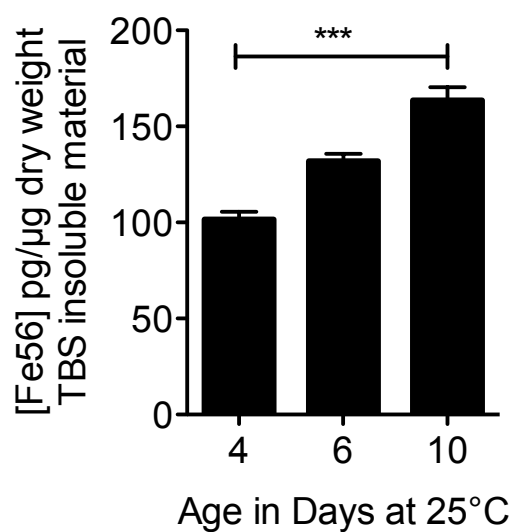

**Supplementary Figure 8:** Insoluble iron increases in aging wild type *C. elegans*.

Shown are bulk iron measures of Fe56 per unit dry weight of the Tris-buffered saline (TBS) insoluble fraction from aged cohorts of wild type (mean from triplicate measures  $\pm$  SEM; \*\*\*  $p < 0.001$ , 2-tailed *t*-test).

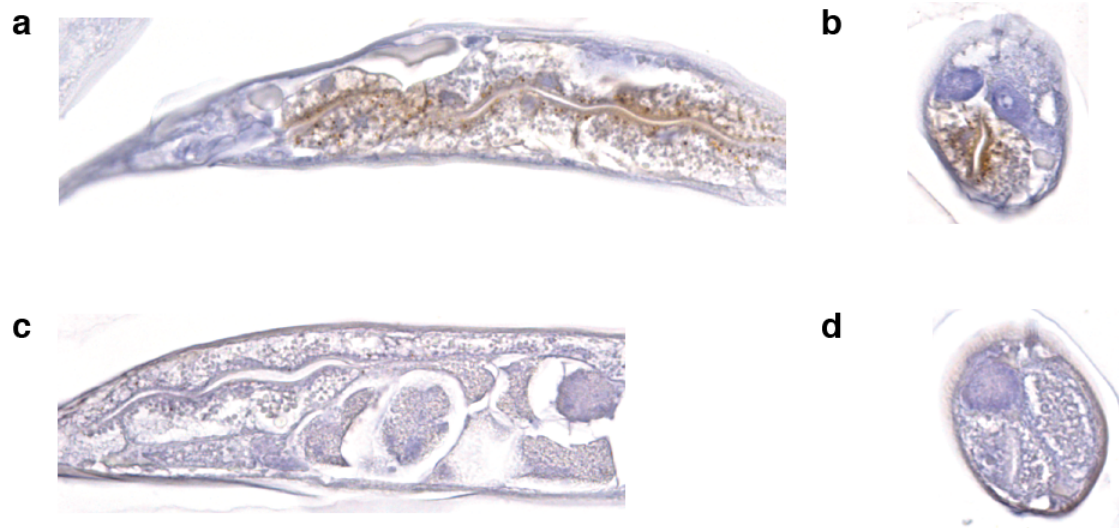

**Supplementary Figure 9:** Histological staining for iron (brown) in wild type (a,b) and (c,d) *ftn-2(-);ftn-1(-)* null adult (5-day-old). *ftn-2(-);ftn-1(-)* null animals have markedly reduced iron staining in the intestine. Shown are representative longitudinal and transverse cross sections.

**(i) Wild type 5-day old**

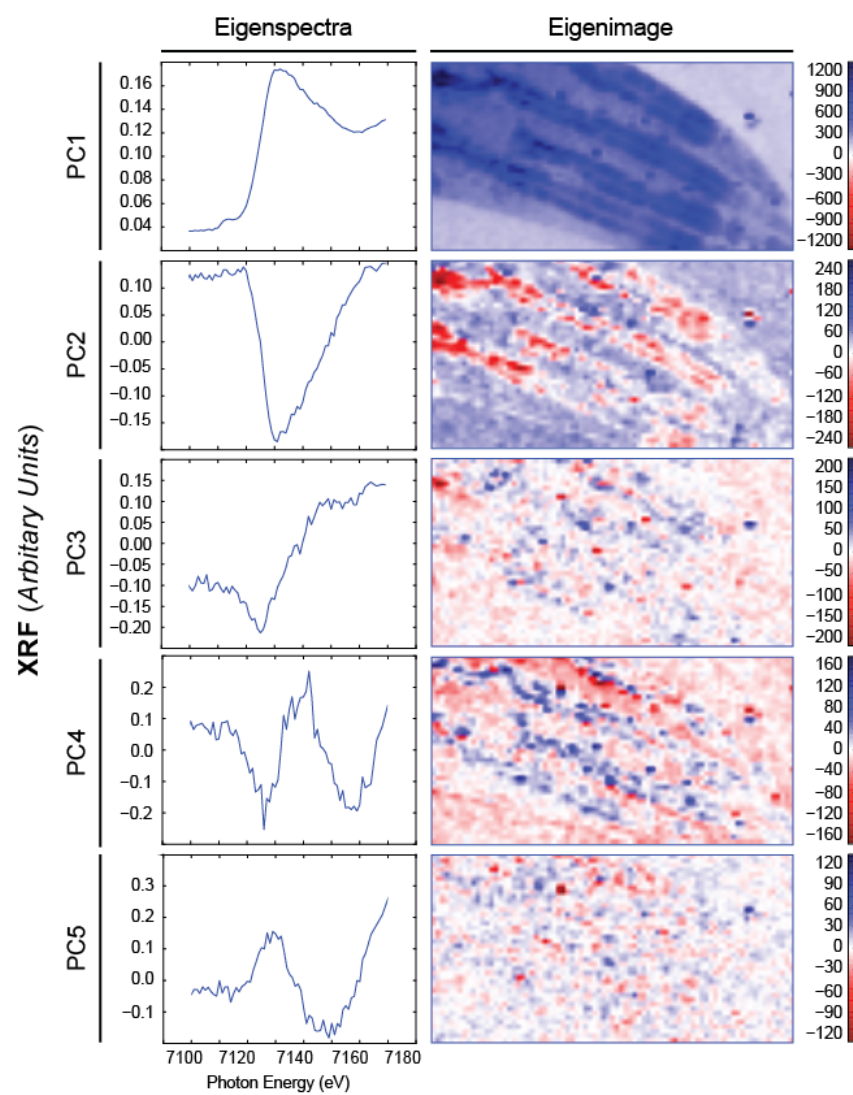

**(ii)**

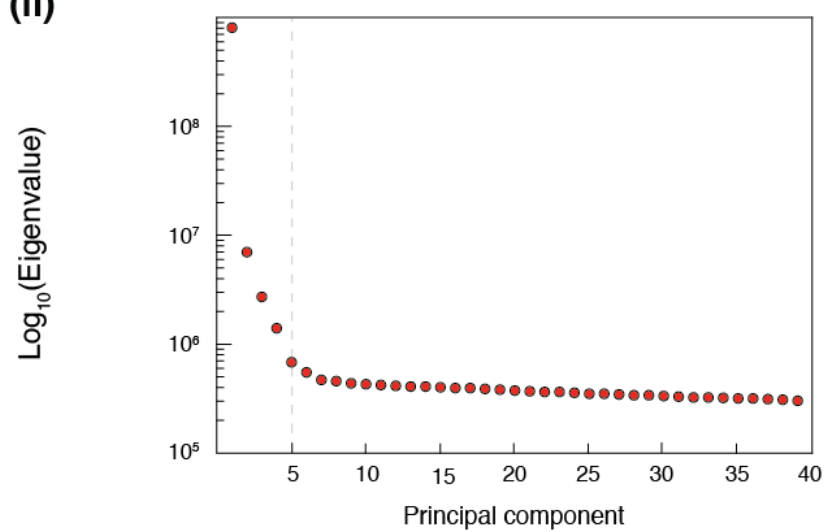

(i) *ftn-2;ftn-1* null 5-day old

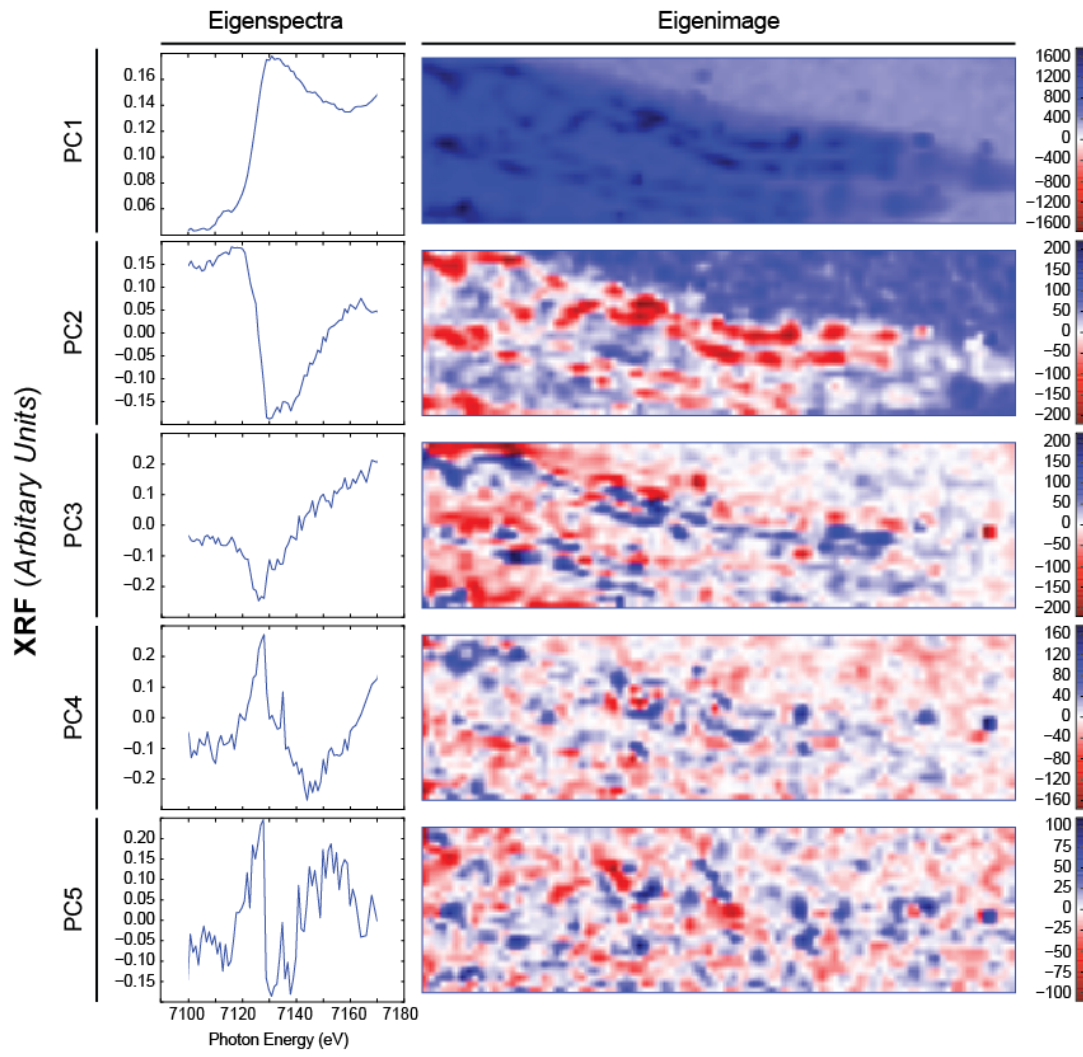

(ii)

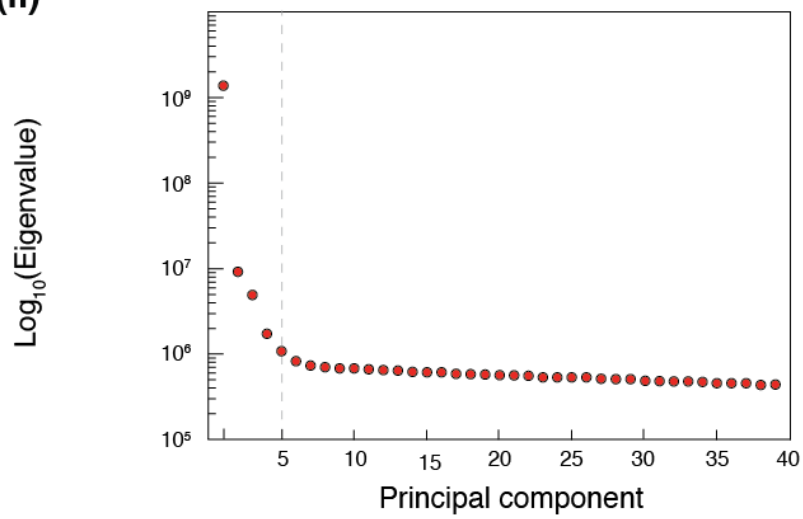

**(i) Wild type 12-day old**

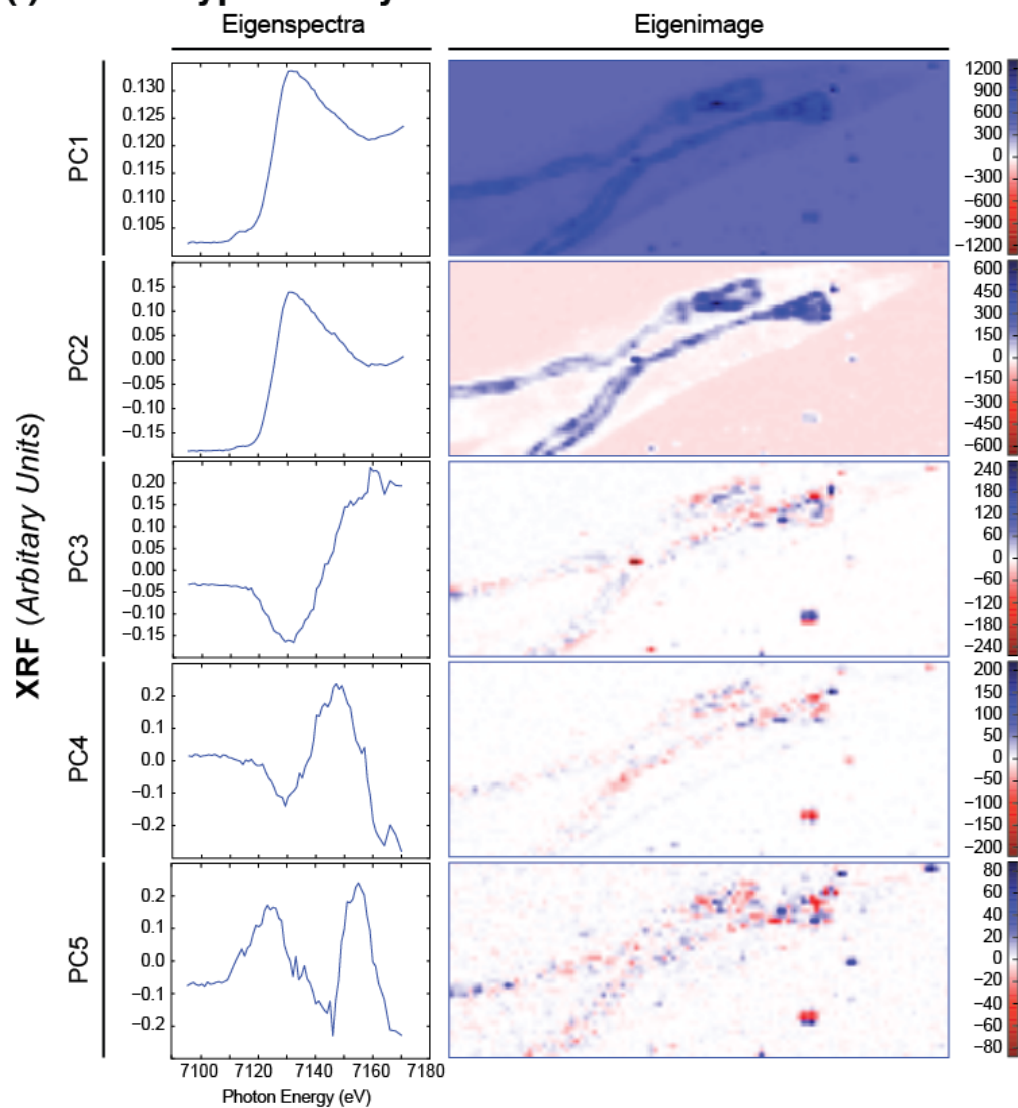

**(ii)**

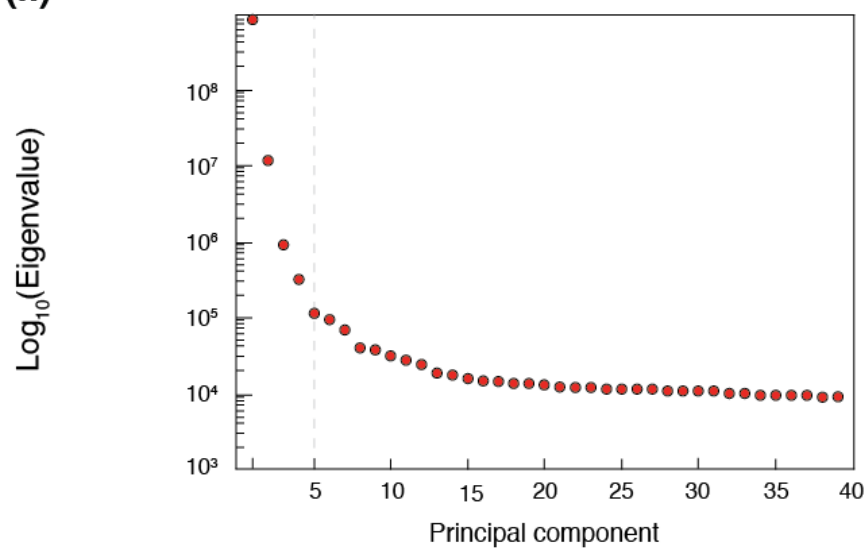

**Supplementary Figure 10:** (i) Principal component analysis (PCA) was used to obtain a set of abstract eigenimages and eigenspectra from the data's covariance matrix. These data provided a reduced orthogonalized search space for clustering pixels with similar spectral response in subsequent analysis. (ii) Based on the Skree plot –  $\log_{10}(\text{eigenvalues})$  as a function of principal component – the first 5 components accounted for >98% of the observed variance and additional components were excluded from the analysis. (a) Wild type (WT) 5-day old; (b) *fin-2* (-) 5-day old; and (c) WT 12-day old



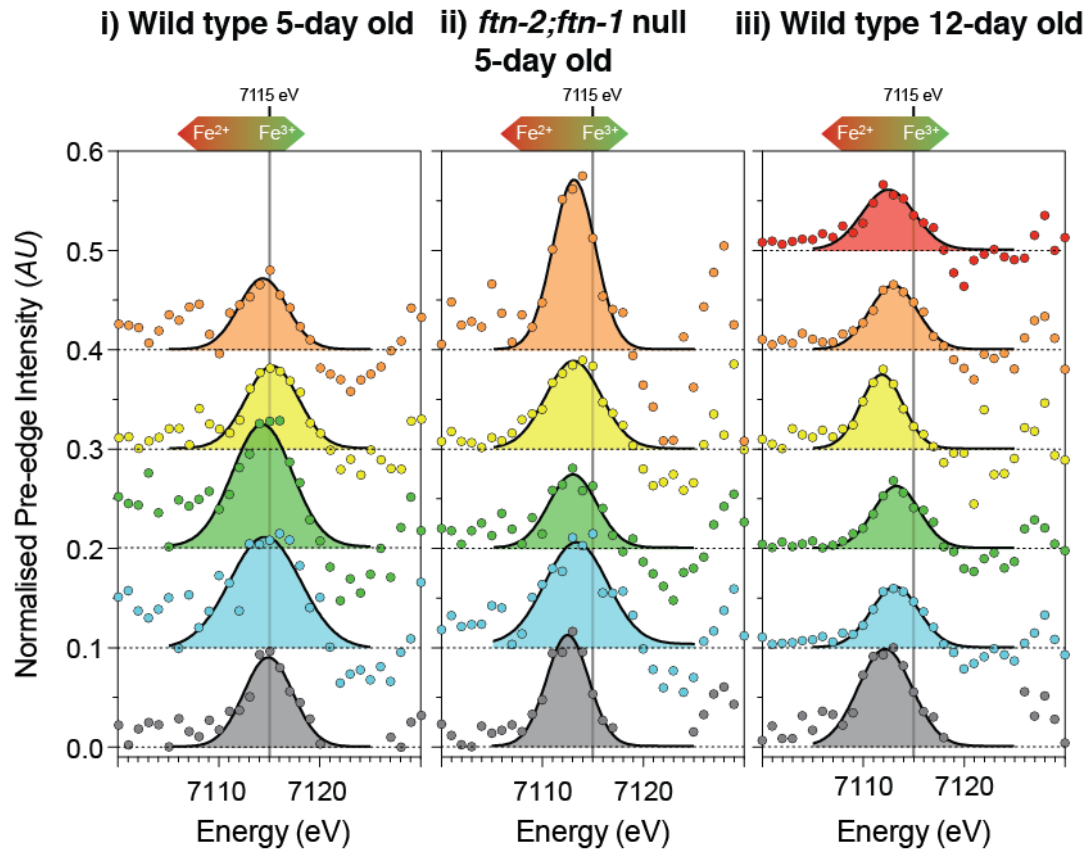

**Supplementary Figure 11:** The extracted 1s→3d pre-edge features (after subtraction of intensity due to the rising edge) show systematic changes in both centroid energy and intensity with the ratio of  $\text{Fe}^{3+}/\text{Fe}^{2+}$ . The raw data and fits are superimposed to emphasize the quality of the fits from which the centroid values were determined. The extracted pre-edge (circles), and Gaussian components of the fit (solid black lines), are shown for each ROI presented in Figure 5.

**a**

gtataatttatctcccaaaaaacactttttcaagttttataacctatatctaagtttaaaaaattttgagta  
caggacaagtatgagtttacgaagcatcatattaaaatcaaaatgtaatgtgaatgtggacgctagaaa  
gcaggcgaaaaaggacatcacactttctgcaaaaagttattttcattcggcgatccttggatgtagttt  
tcttacagaaggttaagcttctcaaaatgtacttcaacacttaggtttccatattagttcattgaaacg  
catgtttctgtaaacaagaacctttctgttccaatatgtaatgtgcaaaaatcataatcagtttatca  
atgatcacaatcacaaactccgccccagagttgtccagtttaaaaaacacccacagtcgccggacagta  
atcaagtcattatattttctgccaagtaaatcgctcATGTCCTAGCTCGTCAAAACTATCACGATGAAG  
TCGAAGCGGCCGTCAATAAACAGgtatgatcattgttttgacaaatgggaaaaatatattaggaaggtt  
ggaaattgagaagagatttagaaaaagagaggtgtgtcgtgagaaaaattaatcactgatgtctggtta  
ctttaaattaggaatttaactgattaataaaaaacattgaaacacaccacacgcttatttttccaaccg  
caacattttgttttttttaacgaacaaggcgaggcagacagtagcctgaagaagcgcaatttgatcatg  
gcagcgtcgatgatttctttgtcttattgccagtcacccaaaaaaatatacagaataggcggcagtag  
atagacgagcagctgagactgaaagcgtctacaataaaaaatcctatctgagcttgcctttgaaactggac  
gaaatttaacactgaaatgcttttaaaattagaagtattactoaattaaaagcttaaattacctttccag  
ATTAACGTAGAACTCTACGCCCTCTATGTCATCTATCGATGTCGCACACTTCGATCGTGATGATATC  
GCACTTCGGAACATTGCCAAATTTTCAAGGAGCAATCGGATGAGGAGCGTGGCCATGCCACAGAGCTC  
ATGAGAATTCAAGCTGTCCGTGGAGGACGTGTGCCATGCAGAACATTCAGAAGCCAGAGAAAGACGAG  
TGGGGAAGTGTCTTGAAGCATTTGAAGCCGCACTTGCTCTAGAGAGAGCCAATAATGCATCTTTGTTG  
AAGCTTCATGGAATCGCCGAACAACGCAATGACGCGCACTTGACAAATTACATTCAGGAGAAGTATTTG  
GAAGAGCAGgttggcattttcaqgttttaaacctcctatttttataacgttttattaagGTACATTCGATCAA  
TGAATTTGCTCGCCACATTGCAAAATATCAAGAGAGCCGGCCAGGACTCGGAGAATATTGTTTCGACAA  
AGAGGAATTTTCTGATTAATAaattttttatttgatgtattttattgtacatatggatgaaattgtatatt  
actgaaatgaaacacattgaaaacttcagagattagcagttcctaaaaaggttcaaccttttttcaacc  
tttggtggcgaaatctgagacacataaggtgttttttaaatgtttatttggaaaaaccgttagtatatg  
gaattaatacaatataagggaaatattttgtattgaagcttacaagaagctttcattgtttacacgccc  
atgtggaattctacgttttcagatgttttccaaaaaacaacataatatttgttctgggtatatcaaaa  
agatttccaaaaaattatttctaattttcaaaaaatatctatcgatgtggaaagtgtttagaact  
taaaaaagtttctgtatactttcagacagaatttttgttttcaatggcattttttgaatgttttcataa  
ccaacgtggctcaataatgtttttgaaatgcacttatgtacatttttgtttottaattatattttcaaaa  
cagcttcatttctttaataatgtgtatatttaaaaaaaa

**b**

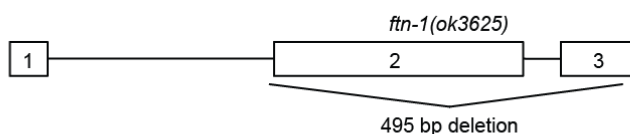

**c**

|     |     |     |     |     |     |     |     |     |     |     |     |     |     |     |     |     |     |     |     |     |
|-----|-----|-----|-----|-----|-----|-----|-----|-----|-----|-----|-----|-----|-----|-----|-----|-----|-----|-----|-----|-----|
| ATG | TCT | CTA | GCT | CGT | CAA | AAC | TAT | CAC | GAT | GAA | GTC | GAA | GCG | GCC | GTC | AAT | AAA | CAG | gta | tga |
| M   | S   | L   | A   | R   | Q   | N   | Y   | H   | D   | E   | V   | E   | A   | A   | V   | N   | K   | Q   | V   | *   |

**Supplementary Figure 12:** DNA sequence of the *ftm-1* locus. **(a)** Shown are intronic and untranslated sequences in lower case and exon sequence in (blue) upper case. The *ftm-1(ok3625)* lesion is underlined. **(b)** Schematic of the *ftm-1(ok3625)* deletion and **(c)** predicted 20 amino acid truncation product..

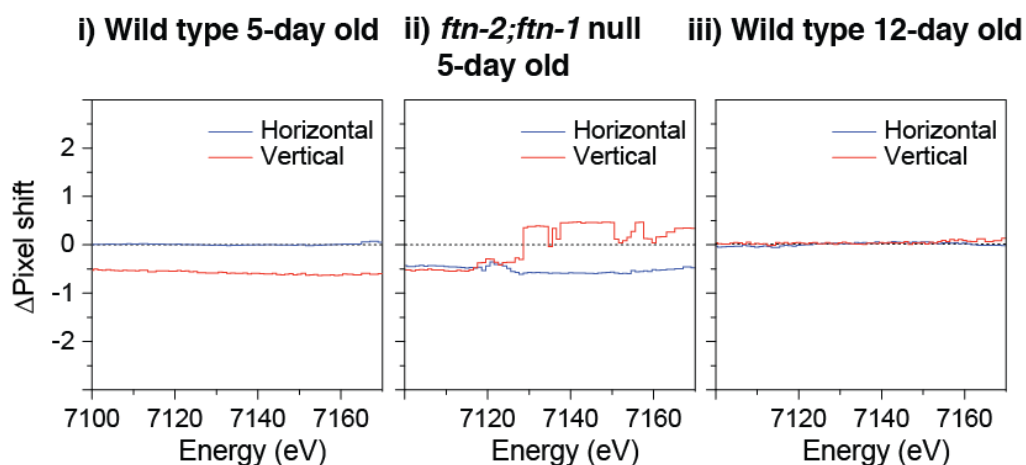

**Supplementary Figure 13:** The distribution of Ca was used to align each elemental micrograph prior to XANES analysis. As Ca is the most readily diffusible inorganic element and highly enriched within the intestine (along with Fe) we utilized the cross-correlation routine implemented in MANTiS to ensure major features were aligned before undertaking PCA.
